# Supplementary material
Source: Springer Nature journal article supplement (https://www.springermedizin.de/resource/supplementary/13048_2010_61_MOESM7_ESM.pdf/9664852)

**A**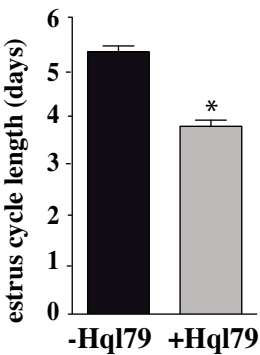**B**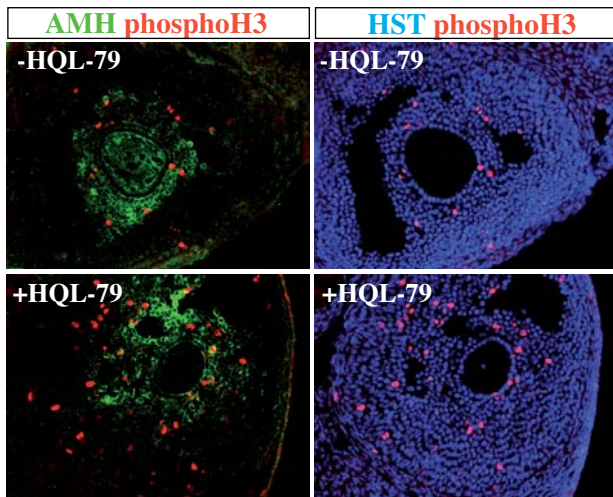**C**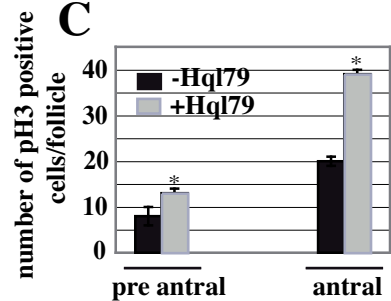**D**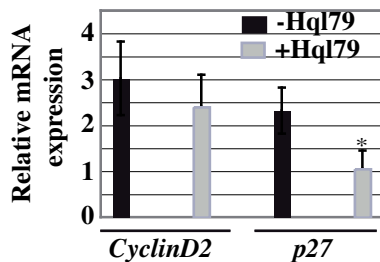**E**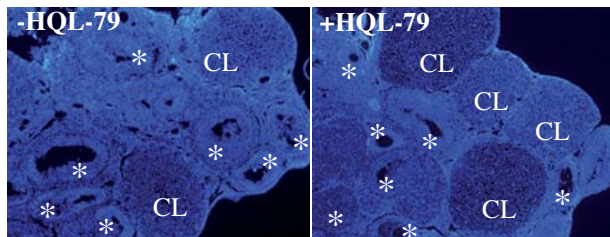

Supplement: MOESM7 [file 9664852]
